# Supplementary material for: Mn3O4 nanozymes boost endogenous antioxidant metabolites in cucumber (Cucumis sativus) plant and enhance resistance to salinity stress
Source: Royal Society of Chemistry journal article supplement (doi:10.1039/d0en00214c), 2020-01-01
Supplement: d0en00214c1.pdf [file d0en00214c1.pdf]

*Supporting Information for*

**Mn<sub>3</sub>O<sub>4</sub> Nanoenzyme Boost Endogenous  
Antioxidant Metabolites in Cucumber (*Cucumis  
sativus*) Plant and Enhance Resistance to  
Salinity Stress**

Li Lu<sup>§</sup>, Min Huang<sup>§</sup>, Yuxiong Huang<sup>†</sup>, Philippe F.-X. Corvini<sup>ζ</sup>, Rong Ji<sup>§,\*</sup>

Lijuan Zhao<sup>§\*</sup>

<sup>§</sup>State Key Laboratory of Pollution Control and Resource Reuse, School of  
Environment, Nanjing University, Nanjing 210023, China

<sup>†</sup>Shenzhen Environmental Science and New Energy Technology Engineering  
Laboratory, Tsinghua-Berkeley Shenzhen Institute (TBSI), Tsinghua Shenzhen  
International Graduate School, Tsinghua University, Shenzhen 518055, P. R. China.

<sup>ζ</sup>Institute for Ecopreneurship, School of Life Sciences, University of Applied  
Sciences and Arts Northwestern Switzerland, Gründenstrasse 40, 4132 Muttenz,  
Switzerland

\*Corresponding author. Tel: +86 025-8968 0581; fax: +86 025-8968 0581.

Email address: [ji@nju.edu.cn](mailto:ji@nju.edu.cn); [ljzhao@nju.edu.cn](mailto:ljzhao@nju.edu.cn)

**Page S3 GC-MS Method and Dissolution test of Mn<sub>3</sub>O<sub>4</sub> NPs.**

**Page S4 Table S1**

**Page S5 Table S2.**

**Page S6 Table S3.**

**Page S7 Figure S1.**

**Page S8 Figure S2.**

**Page S9 Figure S3.**

**GC-MS Method.** Helium (>99.999%) was used as the carrier gas at a constant flow rate of 1.0 mL min<sup>-1</sup> through the column. The initial oven temperature was 60 °C, ramped to 125 °C at a rate of 8 °C min<sup>-1</sup>, to 210 °C at a rate of 4 °C min<sup>-1</sup>, to 270 °C at a rate of 5 °C min<sup>-1</sup>, to 305 °C at a rate of 10 °C min<sup>-1</sup>, and finally, held at 305 °C for 3 min. The injection volume was 1 µL with an injector temperature of 260 °C in splitless mode. The temperature of the MS quadrupole and ion source (electron ionisation) was set to 150 and 230 °C, respectively. The ionisation energy was 70 eV. Mass data were acquired in a full-scan mode (m/z 50–500), and the solvent delay time was set to 5 min. Quality control samples, which were prepared by applying small aliquots from each sample with L-2-chlorophenylalanine as an internal standard, were injected at regular intervals (every 10 samples) throughout the analytical run (Zhao et al., 2019).

**Reference:**

Zhao et al. Metabolomics reveals that engineered nanomaterial exposure in soil alters both soil rhizosphere metabolite profiles and maize metabolic pathways. *Environ. Sci.: Nano*, 2019, 6, 1716.

**Dissolution test of Mn<sub>3</sub>O<sub>4</sub> NPs.** Prepare a suspension of 20 mg/L Mn<sub>3</sub>O<sub>4</sub> NPs and sonicated for 30 min to get a well dispersed suspension. Solution samples were taken at 24 and 96 h. To separate released Mn ions from Mn<sub>3</sub>O<sub>4</sub> NPs, each sample was centrifuged in ultrafiltration concentration centrifugal tube (2-5 nm pore size, molecular weight cutoff 10K, PALL, America) at 10000 rpm for 15 minutes. The filtrate containing only Mn ions was collected and analyzed with ICP-MS (1% HNO<sub>3</sub>). The experiment was run for triplicate.

**Table S1.** ROS scavenging capacities of Mn<sub>3</sub>O<sub>4</sub> NPs

| Material                       | Concentration | Clearance rate               |                               |        |
|--------------------------------|---------------|------------------------------|-------------------------------|--------|
|                                |               | •O <sub>2</sub> <sup>-</sup> | H <sub>2</sub> O <sub>2</sub> | •OH    |
| Mn <sub>3</sub> O <sub>4</sub> | 20 ppm        | 7.62%                        | 5.31%                         | 19.14% |
| Mn <sub>3</sub> O <sub>4</sub> | 100 ppm       | 46.29%                       | 40.36%                        | 30.21% |

**Table S2.**

**Macro- and micro elements in cucumber tissues (mg/kg dry weight)**

|                                        | Al           |    | Cu         |    | Zn          |   | Fe       |   | Na          |   | K            |    | Ca                  |          | Mg                |          | Si         |   | P            |   |  |
|----------------------------------------|--------------|----|------------|----|-------------|---|----------|---|-------------|---|--------------|----|---------------------|----------|-------------------|----------|------------|---|--------------|---|--|
|                                        | Leaf         |    |            |    |             |   |          |   |             |   |              |    |                     |          |                   |          |            |   |              |   |  |
| Control                                | 95.3 ± 3.4   | a  | 40.9 ± 1.2 | ab | 57.1 ± 5.9  | a | 182 ± 31 | a | 751 ± 134   | a | 36029 ± 4350 | a  | 16244 ± 711         | b        | 6570 ± 445        | b        | 2736 ± 174 | a | 4271 ± 601   | a |  |
| 20 ppm Mn <sub>3</sub> O <sub>4</sub>  | 84.6 ± 7.6   | a  | 42.6 ± 0.6 | a  | 62.4 ± 6.3  | a | 185 ± 8  | a | 743 ± 107   | a | 37954 ± 4648 | a  | <b>19680 ± 2028</b> | <b>a</b> | <b>7424 ± 515</b> | <b>a</b> | 2786 ± 129 | a | 5071 ± 1241  | a |  |
| 100 ppm Mn <sub>3</sub> O <sub>4</sub> | 87.8 ± 5.3   | a  | 39.6 ± 2.2 | b  | 54.1 ± 4.5  | a | 145 ± 12 | b | 560 ± 99    | a | 33120 ± 2043 | a  | 15831 ± 652         | b        | 6047 ± 236        | b        | 2580 ± 210 | a | 3795 ± 234   | a |  |
|                                        | Stem         |    |            |    |             |   |          |   |             |   |              |    |                     |          |                   |          |            |   |              |   |  |
| Control                                | 35.2 ± 3.4   | a  | 36.6 ± 1.4 | a  | 27.7 ± 1.8  | a | 97 ± 8   | a | 5762 ± 1530 | a | 92902 ± 2149 | ab | 5963 ± 171          | b        | 3161 ± 269        | a        | 570 ± 31   | a | 11345 ± 2865 | a |  |
| 20 ppm Mn <sub>3</sub> O <sub>4</sub>  | 32.8 ± 7.6   | a  | 35.9 ± 0.6 | a  | 26.9 ± 2.8  | a | 99 ± 9   | a | 4363 ± 1064 | a | 96904 ± 7161 | a  | 6687 ± 184          | a        | 3181 ± 211        | a        | 543 ± 33   | a | 10978 ± 2310 | a |  |
| 100 ppm Mn <sub>3</sub> O <sub>4</sub> | 32.8 ± 5.3   | a  | 35.4 ± 0.9 | a  | 23.3 ± 5.4  | a | 85 ± 7   | a | 5247 ± 195  | a | 82389 ± 7264 | b  | 5990 ± 461          | b        | 3333 ± 199        | a        | 431 ± 12   | b | 10165 ± 1003 | a |  |
|                                        | Root         |    |            |    |             |   |          |   |             |   |              |    |                     |          |                   |          |            |   |              |   |  |
| Control                                | 117.9 ± 17.0 | a  | 37.6 ± 1.3 | a  | 80.3 ± 5.2  | a | 131 ± 18 | a | 3732 ± 357  | a | 59024 ± 5556 | a  | 10436 ± 533         | a        | 2187 ± 81         | a        | 454 ± 74   | a | 4684 ± 433   | a |  |
| 20 ppm Mn <sub>3</sub> O <sub>4</sub>  | 89.3 ± 7.9   | b  | 38.3 ± 1.3 | a  | 78.2 ± 18.7 | a | 138 ± 47 | a | 4341 ± 865  | a | 61581 ± 4401 | a  | 9517 ± 481          | a        | 1980 ± 204        | a        | 432 ± 36   | a | 4859 ± 891   | a |  |
| 100 ppm Mn <sub>3</sub> O <sub>4</sub> | 98.9 ± 15.3  | ab | 39.0 ± 1.9 | a  | 82.2 ± 18.1 | a | 112 ± 6  | a | 3621 ± 253  | a | 57909 ± 3242 | a  | 9758 ± 652          | a        | 2054 ± 93         | a        | 402 ± 40   | a | 4381 ± 296   | a |  |

**Table S3.** Details regarding the responsible metabolites leading to the grouping between control and Mn<sub>3</sub>O<sub>4</sub> NPs groups

| Metabolite name            | Average Rt(min) | Quant mass | Total score | Database | HMDB ID     | p-value |
|----------------------------|-----------------|------------|-------------|----------|-------------|---------|
| Dihydroxycyclohexane       | 7.74            | 258        | 76.7        | LUG      | /           | 0.00534 |
| Deoxyguanosine             | 24.454          | 281        | 67.9        | LUG      | HMDB0000085 | 0.11891 |
| Ketoglucose dimethylacetal | 10.91           | 102        | 80.7        | LUG      | HMDB0029932 | 0.33458 |
| Dimethylaminoazobenzene    | 20.779          | 282        | 68.5        | LUG      | HMDB0032141 | 0.00536 |
| Adenine                    | 25.095          | 264        | 84.1        | LUG      | HMDB0000034 | 0.02996 |
| Alanine                    | 6.634           | 176        | 84.5        | LUG      | HMDB0000056 | 0.02140 |
| Citrulline                 | 24.241          | 157        | 77.8        | LUG      | HMDB0000904 | 0.07148 |
| Cyanoalanine               | 12.688          | 141        | 82.6        | LUG      | /           | 0.23581 |
| Xylose                     | 9.559           | 160        | 85.5        | LUG      | HMDB0000098 | 0.15794 |
| Ferulic acid               | 30.557          | 338        | 80.6        | LUG      | HMDB0000954 | 0.03663 |
| Aminobutyric acid          | 16.639          | 174        | 93.2        | LUG      | HMDB0000112 | 0.18669 |
| Glycerol                   | 10.576          | 147        | 97.7        | LUG      | HMDB0000131 | 0.01764 |
| Indoxyl sulfate            | 7.276           | 163        | 67.9        | LUG      | HMDB0000682 | 0.11088 |
| Alanine                    | 7.481           | 116        | 95.3        | LUG      | HMDB0000161 | 0.12491 |
| Isoleucine                 | 10.981          | 158        | 96.2        | LUG      | HMDB0000172 | 0.00713 |
| Lysine                     | 26.634          | 174        | 92.2        | LUG      | HMDB0000182 | 0.00921 |
| Phenylalanine              | 19.04           | 218        | 94.5        | LUG      | HMDB0000159 | 0.01764 |
| Sorbose                    | 25.406          | 103        | 95.9        | LUG      | HMDB0001266 | 0.02698 |
| Threonic acid              | 13.669          | 148        | 84.2        | LUG      | HMDB0062620 | 0.06146 |
| Tyrosine                   | 26.968          | 218        | 86.2        | LUG      | HMDB0000158 | 0.04552 |
| Valine                     | 9.452           | 144        | 97.3        | LUG      | HMDB0000883 | 0.06465 |
| Maltitol                   | 19.926          | 288        | 71.9        | LUG      | HMDB0002928 | 0.40746 |
| Methionine                 | 16.334          | 176        | 84.9        | LUG      | HMDB0000696 | 0.11891 |
| Methyl glucopyranoside     | 24.897          | 204        | 97.7        | LUG      | HMDB0029965 | 0.11036 |
| Methylalanine              | 5.159           | 130        | 83.3        | LUG      | HMDB0094692 | 0.35077 |
| Palatinitol                | 29.21           | 204        | 81          | LUG      | /           | 0.03012 |
| Phosphenodiimidic amide    | 14.662          | 350        | 76.3        | LUG      | /           | 0.05135 |
| Piceatannol                | 40.783          | 194        | 43.5        | LUG      | HMDB0004215 | 0.06879 |
| Pyruvic acid               | 6.583           | 174        | 97.5        | LUG      | HMDB0000243 | 0.10869 |
| Spermine                   | 33.841          | 174        | 77.5        | LUG      | HMDB0001256 | 0.11036 |

LUG: Untarget database of GC-MS from Lumingbio.

HMDB ID: The Human Metabolome Database.

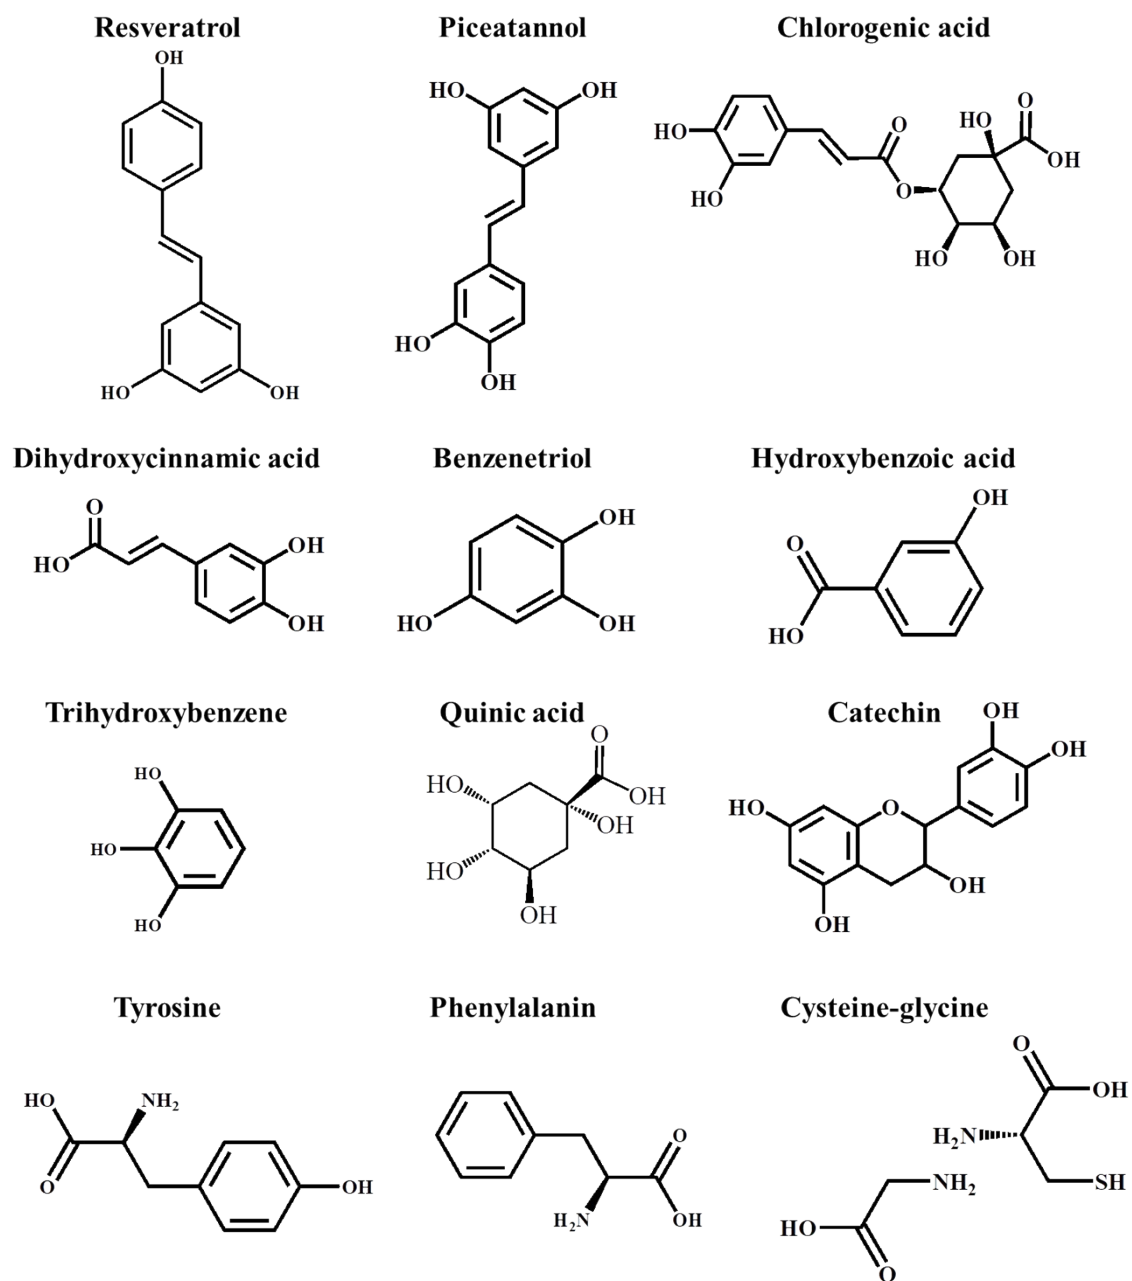

**Figure S1.** Structure of antioxidant compounds

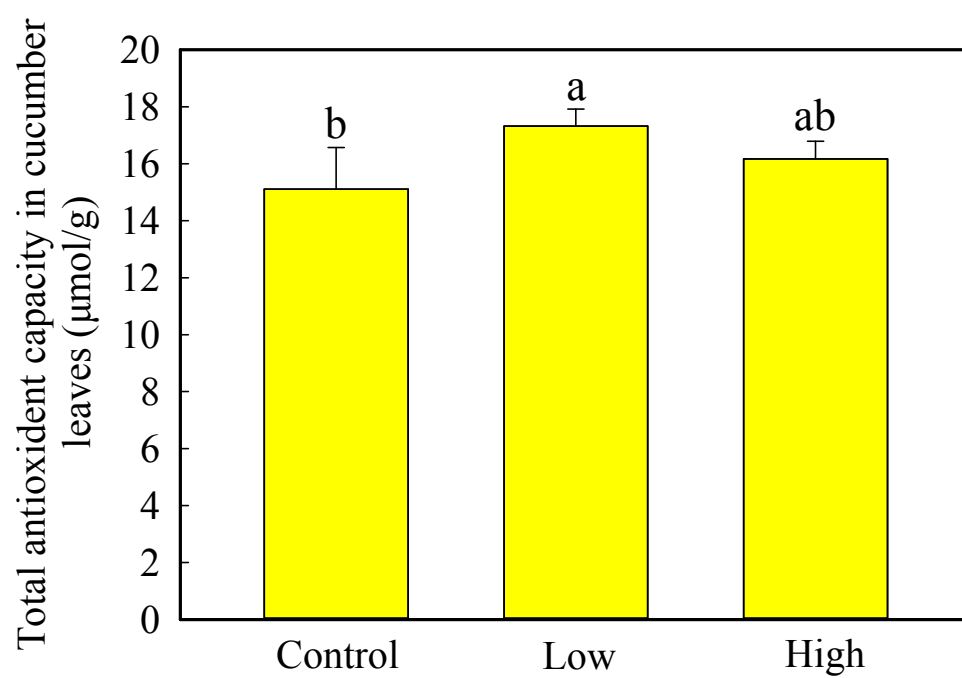

**Figure S2.** Total antioxidant capacities of cucumber leaves treated with  $\text{Mn}_3\text{O}_4$  NPs

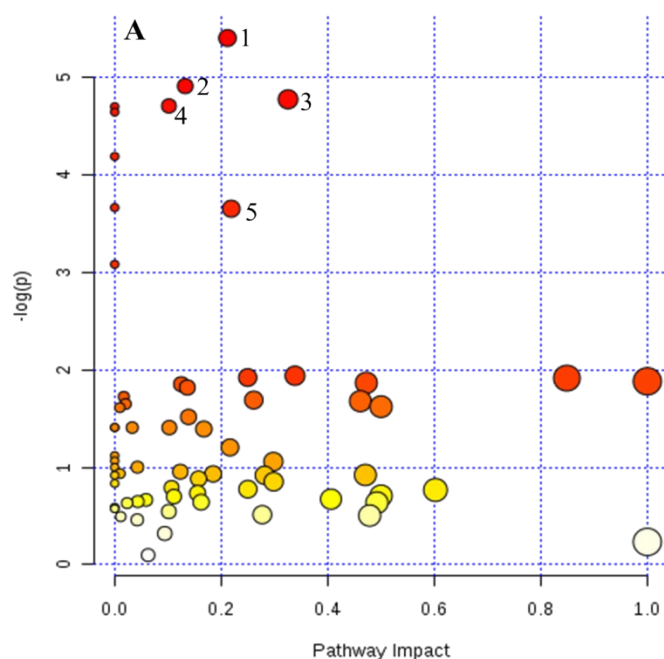

(1) Pantothenate and CoA biosynthesis;(2) Stilbenoid, diarylheptanoid and gingerol biosynthesis;(3) beta-Alanine metabolism;(4) Phenylpropanoid biosynthesis;(5) Pentose and glucuronate interconversions.

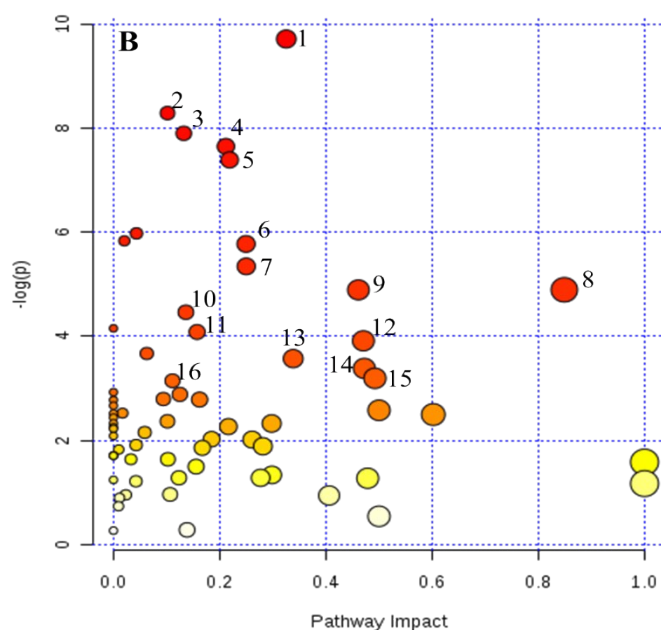

(1) beta-Alanine metabolism; (2) Phenylpropanoid biosynthesis;(3) Stilbenoid, diarylheptanoid and gingerol biosynthesis; (4) Pantothenate and CoA biosynthesis; (5) Pentose and glucuronate interconversions; (6) Pyrimidine metabolism; (7) Lysine degradation; (8) Alanine, aspartate and glutamate metabolism; (9) Arginine and proline metabolism; (10) Butanoate metabolism; (11) Tryptophan metabolism; (12) Phenylalanine metabolism; (13) Citrate cycle (TCA cycle); (14) Glyoxylate and dicarboxylate metabolism; (15) Glutathione metabolism; (16) Aminoacyl-tRNA biosynthesis

**Figure S3.** Perturbed metabolic pathways in cucumber leaves in response to  $\text{Mn}_3\text{O}_4$  NPs
